# Supplementary material
Source: PubMed Central journal article supplement (PMC7170716)
Supplement: EMS85879-supplement-Supplementary_table_1.pdf [file EMS85879-supplement-Supplementary_table_1.pdf]

## Supplementary Information

### The ABC exporter IrtAB imports and reduces mycobacterial siderophores

Fabian M. Arnold<sup>1,#</sup>, Miriam S. Weber<sup>2,#</sup>, Imre Gonda<sup>1,#</sup>, Marc J. Gallenito<sup>3</sup>, Sophia Adenau<sup>1</sup>, Pascal Egloff<sup>1</sup>, Iwan Zimmermann<sup>1</sup>, Cedric A.J. Hutter<sup>1</sup>, Lea M. Hürlimann<sup>1</sup>, Eike Peters<sup>4</sup>, Jörn Piel<sup>4</sup>, Gabriele Meloni<sup>3</sup>, Ohad Medalia<sup>2</sup> and Markus A. Seeger<sup>1,\*</sup>

<sup>1</sup>Institute of Medical Microbiology, University of Zurich, Switzerland

<sup>2</sup>Department of Biochemistry, University of Zurich, Switzerland

<sup>3</sup>Department of Chemistry and Biochemistry, University of Texas at Dallas, USA

<sup>4</sup>Department of Microbiology, ETH Zurich, Switzerland

# These authors contributed equally to this manuscript

\* Corresponding author: [m.seeger@imm.uzh.ch](mailto:m.seeger@imm.uzh.ch)

## Content

Supplementary Table 1

### Supplementary Table 1

Primer sequences (5'-3' direction).

|            |                                                   |
|------------|---------------------------------------------------|
| Primer #1  | ATATATGCTCTTCTAGTCTTCGTGGACTGGGTGCCCGCGACCAT      |
| Primer #2  | TATATAGCTCTTCATGCCCGTGCCGTGACCCGATCGCCCACTC       |
| Primer #3  | TATATAGCTCTTCATGCTGTGGACGTCTCGCCGCGGGAG           |
| Primer #4  | ATATATGCTCTTCTAGTCGGGCAGAGGCGGGCAGTCGGTTGCT       |
| Primer #5  | ATATATGCTCTTCTAGTGCTCGTGAATCCAGGGCGTGATGATG       |
| Primer #6  | TATATAGCTCTTCATGCGTGAGTGATCTGCCAGTCCGCCGCTC       |
| Primer #7  | TATATAGCTCTTCATGCCTTGTCGTCGTCACCCGCGTTG           |
| Primer #8  | ATATATGCTCTTCTAGTACACCCGAGGTGAATCCCGCAC           |
| Primer #9  | CTGGTGCTCGACcAGGCCACCGCTTC                        |
| Primer #10 | GAACGCGGTGGCCTgGTCGAGCACCAG                       |
| Primer #11 | GCTGCTGGTGGACcAGGCGACCAGTGC                       |
| Primer #12 | GCACTGGTCGCCTgTCCACCAGCAGC                        |
| Primer #13 | GCTGATCCTCGACcAGGCCACCGCTTC                       |
| Primer #14 | GAACGCGGTGGCCTgGTCGAGGATCAGC                      |
| Primer #15 | GTTGCTCGTCGACcAGGCCACCAGCG                        |
| Primer #16 | CGCTGGTGGCCTgGTCGACGAGCAAC                        |
| Primer #17 | CGACCTCCTGGCTGgaGTTCTGGTTTCCCG                    |
| Primer #18 | CGGGAAACCAGAAcCAGCCAGGAGGTGC                      |
| Primer #19 | CGAACTGCACCCGgAGGCCTACTGGACCGAGGGCgaaGCGATGGGCACC |
| Primer #20 | GGTGCCCATCGTtcGCCCTCGGTCCAGTAGGCCTcCGGGTGCAGTTCCG |
| Primer #21 | ATATATGCTCTTCTAGTTGAACAGGTCCAGACGCCACAG           |
| Primer #22 | TATATATGCTCTTCAAGGACGTTCTCGCGTGACTGACATTGC        |
| Primer #23 | ATATATGCTCTTCTCCTGCAGAGCGTTCCGTCGGTCATCAC         |
| Primer #24 | TATATAGCTCTTCATGCCGAGGCGTTCAACCGGTACTIONG         |
| Primer #25 | ATATATGCTCTTCTAGTTACGCACTGTCGTACCGCAACG           |
| Primer #26 | TATATATGCTCTTCAAGGAGGTCAACGGGTCTGGTTCTCG          |
| Primer #27 | ATATATGCTCTTCTCCTCGGTTTCAACGAGCCCCACATTGG         |
| Primer #28 | TATATAGCTCTTCATGCTCCGGAGAGCAGATCGATGAGTGC         |
| Primer #29 | ATATATGCTCTTCTAGTGATCCTCAACGGTTTCTTCTCGGC         |
| Primer #30 | TATATATGCTCTTCAAGGGAACAGCGTCGGGACGGTCGATGTGC      |
| Primer #31 | ATATATGCTCTTCTCCTTAGTGCCGGAAGACAGCGGTGCC          |
| Primer #32 | TATATAGCTCTTCATGCATGTCCACGACGTGCACCTGTTTAC        |
| Primer #33 | ATATATGCTCTTCTAGTTCGGGATCAGAAGACACTGGTGGCTCC      |
| Primer #34 | TATATATGCTCTTCAAGGACGAGTTCTGGCGTCGGCAACACGAG      |
| Primer #35 | ATATATGCTCTTCTCCTCAGCGGTCTCTCCCGTATTTCGTGAC       |
| Primer #36 | TATATAGCTCTTCATGCGATGCACGTGGTGACGGTGTGACGAGC      |
